# Supplementary material for: New group IIIA metal phosphate–oxalates containing dimethylammonium cations with proton conductivity
Source: Royal Society of Chemistry journal article supplement (doi:10.1039/d3dt03368f), 2024-01-01
Supplement: d3dt03368f1.pdf [file d3dt03368f1.pdf]

# Supporting information

## New group IIIA metal phosphate-oxalates containing dimethylammonium cations with proton conductivity

Tian-Yu Pan,<sup>a,b</sup> Wei-Yang Wen,<sup>a,b</sup> Wen Ma,<sup>\*c</sup> Shou-Tian Zheng,<sup>a</sup> Mei-Ling Feng,<sup>\*b</sup> and Xiao-Ying Huang

*a* College of Chemistry, Fuzhou University, Fuzhou 350116, Fujian, China.

*b* State Key Laboratory of Structure Chemistry, Fujian Institute of Research on the Structure of Matter, Chinese Academy of Sciences, Fuzhou 350002, China.

*c* School of Materials and Chemical Engineering, Xuzhou University of Technology, Xuzhou, Jiangsu, China

† E-mail: [mawen@xzit.edu.cn](mailto:mawen@xzit.edu.cn); [fml@fjirsm.ac.cn](mailto:fml@fjirsm.ac.cn).

### Characterization Methods.

Powder X-ray diffraction (PXRD) patterns were recorded in the angular range of  $2\theta = 5\text{--}65^\circ$  on a Rigaku Miniflex II diffractometer with  $\text{CuK}\alpha$  radiation ( $\lambda = 1.54178 \text{ \AA}$ ). The optical absorption spectra were measured with a Shimadzu 2600 UV/vis spectrometer. Thermogravimetric analysis (TGA) was performed on a Netzsch STA449C instrument from room temperature to  $800^\circ\text{C}$  under  $\text{N}_2$  atmosphere at a heating rate of  $10^\circ\text{C}/\text{min}$ . The proton conduction test was performed on a SI 1260 IMPEDANCE/GAINPHASE impedance analyzer. The applied voltage used in the test is  $50 \text{ mV}$ , and the frequency range is  $0.1 \text{ Hz}\sim 1 \text{ MHz}$ .

### X-ray Crystallographic Study

Single-crystal X-ray diffraction (SCXRD) data were recorded on a SuperNova CCD diffractometer with graphite-monochromated  $\text{MoK}\alpha$  radiation ( $\lambda = 0.71073 \text{ \AA}$ ) at  $292 \text{ K}$  for **1** and  $100 \text{ K}$  for **2**. SCXRD data were collected on a XtaLAB Synergy system with graphite-monochromated  $\text{CuK}\alpha$  radiation ( $\lambda = 1.54178 \text{ \AA}$ ) at  $298 \text{ K}$  for **3**. The structures were solved by direct methods and refined by full-matrix least-squares on  $F^2$  using the SHELX-2018 program package.<sup>1</sup> All non-hydrogen atoms were refined anisotropically. The hydrogen atoms connected to O atoms in the phosphate groups were located from difference-Fourier maps and their atomic positions were refined. The hydrogen atoms connected to C atoms were located at geometrically calculated positions while those attached to N atoms were located from difference-Fourier maps and their atomic positions were refined. The lattice water molecule in **3** was located from difference-Fourier maps and its atomic positions were refined.

### Proton Conductivity Measurement

80 mg of the sample was weighed and ground to a homogeneous powder. Two portions of graphite (70 mg) were also weighed and set aside. The raw materials were added to a mould in the order of graphite-sample-graphite and pressed into a 5 mm diameter cylinder using a tablet press. The proton conductivity was obtained by semicircle fittings of Nyquist plots. The conductivities can be expressed by the equation:

$$\sigma = L/SR \text{ (Eq. S1)}$$

where  $\sigma$  represents the conductivity ( $\text{S cm}^{-1}$ ),  $R$  is the resistance value ( $\Omega$ ),  $L$  and  $S$  are the thickness (cm) of the measured sample and the electrode area ( $\text{cm}^2$ ), respectively.

Arrhenius equation can be described by the equation:

$$\ln(\sigma T) = \ln A - E_a/(k_B T) \text{ (Eq. S2)}$$

where  $\sigma$  represents the proton conductivity,  $E_a$  represents the proton-transport activation energy,  $k_B$  is the Boltzmann constant,  $T$  and  $A$  are temperature and pre-exponential factor, respectively.

Table S1 Crystallographic data and structural refinement details for compounds.

|                                                                                             | 1                                                                                            | 2                                                                                            | 3                                                                                            |
|---------------------------------------------------------------------------------------------|----------------------------------------------------------------------------------------------|----------------------------------------------------------------------------------------------|----------------------------------------------------------------------------------------------|
| Empirical formula                                                                           | C <sub>6</sub> H <sub>22</sub> Al <sub>2</sub> N <sub>2</sub> O <sub>20</sub> P <sub>4</sub> | C <sub>6</sub> H <sub>22</sub> Ga <sub>2</sub> N <sub>2</sub> O <sub>20</sub> P <sub>4</sub> | C <sub>6</sub> H <sub>24</sub> N <sub>2</sub> O <sub>21</sub> P <sub>4</sub> In <sub>2</sub> |
| Formula weight                                                                              | 620.09                                                                                       | 705.57                                                                                       | 813.79                                                                                       |
| Crystal system                                                                              | Monoclinic                                                                                   | Monoclinic                                                                                   | Monoclinic                                                                                   |
| Space group                                                                                 | <i>P</i> 2 <sub>1</sub> / <i>c</i>                                                           | <i>P</i> 2 <sub>1</sub> / <i>c</i>                                                           | <i>P</i> 2 <sub>1</sub>                                                                      |
| <i>a</i> /Å                                                                                 | 8.6163 (14)                                                                                  | 8.5858 (10)                                                                                  | 8.95360 (10)                                                                                 |
| <i>b</i> /Å                                                                                 | 9.7354 (17)                                                                                  | 9.7952 (13)                                                                                  | 10.26900 (10)                                                                                |
| <i>c</i> /Å                                                                                 | 12.3722 (18)                                                                                 | 12.5984 (15)                                                                                 | 13.16290 (10)                                                                                |
| $\beta$ /°                                                                                  | 93.861 (15)                                                                                  | 94.080 (12)                                                                                  | 95.5430 (10)                                                                                 |
| <i>V</i> /Å <sup>3</sup>                                                                    | 1035.5 (3)                                                                                   | 1056.8 (2)                                                                                   | 1204.60 (2)                                                                                  |
| <i>Z</i>                                                                                    | 2                                                                                            | 2                                                                                            | 2                                                                                            |
| <i>T</i> /K                                                                                 | 292 (2)                                                                                      | 100 (2)                                                                                      | 298 (2)                                                                                      |
| $\lambda$ /Å                                                                                | 0.71073                                                                                      | 0.71073                                                                                      | 1.54178                                                                                      |
| <i>F</i> (000)                                                                              | 636.0                                                                                        | 708.0                                                                                        | 800.0                                                                                        |
| Theta range for data collection                                                             | 3.2820 to 28.7940°                                                                           | 4.7060 to 29.4700°                                                                           | 3.3560 to 74.7310°                                                                           |
| Index ranges                                                                                | -8 ≤ <i>h</i> ≤ 12, -13 ≤ <i>k</i> ≤ 10, -17 ≤ <i>l</i> ≤ 13                                 | -11 ≤ <i>h</i> ≤ 11, -11 ≤ <i>k</i> ≤ 13, -13 ≤ <i>l</i> ≤ 17                                | -11 ≤ <i>h</i> ≤ 11, -12 ≤ <i>k</i> ≤ 11, -16 ≤ <i>l</i> ≤ 15                                |
| $\rho_{\text{calc}}$ /g cm <sup>-3</sup>                                                    | 1.989                                                                                        | 2.217                                                                                        | 2.244                                                                                        |
| $\mu$ /mm <sup>-1</sup>                                                                     | 0.554                                                                                        | 2.954                                                                                        | 18.729                                                                                       |
| Measured refls.                                                                             | 5714                                                                                         | 5672                                                                                         | 11935                                                                                        |
| Independent refls.                                                                          | 2509                                                                                         | 2566                                                                                         | 4430                                                                                         |
| No. of parameters                                                                           | 165                                                                                          | 165                                                                                          | 334                                                                                          |
| <i>R</i> <sub>int</sub>                                                                     | 0.0431                                                                                       | 0.0451                                                                                       | 0.0374                                                                                       |
| <i>R</i> <sub>1</sub> ( <i>I</i> > 2σ( <i>I</i> )) <sup>a</sup>                             | 0.0450                                                                                       | 0.0400                                                                                       | 0.0305                                                                                       |
| w <i>R</i> <sub>2</sub> ( <i>F</i> <sup>2</sup> ) ( <i>I</i> > 2σ( <i>I</i> )) <sup>b</sup> | 0.0995                                                                                       | 0.0721                                                                                       | 0.0788                                                                                       |
| <i>GOF</i>                                                                                  | 1.022                                                                                        | 1.056                                                                                        | 1.046                                                                                        |

$$^a R_1 = \sum |F_o| - |F_c| / \sum |F_o| \cdot ^b wR_2 = [\sum w(F_o^2 - F_c^2)^2 / \sum w(F_o^2)^2]^{1/2}$$

Table S2 Selected bond lengths (Å) and bond angles (°) for **1**.

| <b>1</b>                                                                                               |            |                    |            |
|--------------------------------------------------------------------------------------------------------|------------|--------------------|------------|
| Al(1)-O(1)                                                                                             | 1.899(2)   | P(2)-O(5)          | 1.509(2)   |
| Al(1)-O(2)#1                                                                                           | 1.876(2)   | P(2)-O(6)          | 1.5741(19) |
| Al(1)-O(5)                                                                                             | 1.827(2)   | P(2)-O(7)          | 1.516(2)   |
| Al(1)-O(8)#2                                                                                           | 1.835(2)   | P(2)-O(8)          | 1.508(2)   |
| Al(1)-O(9)                                                                                             | 1.977(2)   | O(9)-C(1)          | 1.248(3)   |
| Al(1)-O(10)#3                                                                                          | 1.971(2)   | O(10)-C(1)         | 1.253(3)   |
| P(1)-O(1)                                                                                              | 1.4946(19) | C(1)-C(1)#3        | 1.517(5)   |
| P(1)-O(2)                                                                                              | 1.495(2)   | N(1)-C(2)          | 1.467(5)   |
| P(1)-O(3)                                                                                              | 1.570(3)   | N(1)-C(3)          | 1.478(5)   |
| P(1)-O(4)                                                                                              | 1.526(3)   |                    |            |
| Symmetry code: #1 $+x, 1/2-y, -1/2+z$ ; #2 $1-x, 1-y, -z$ ; #3 $1-x, -y, -z$ .                         |            |                    |            |
| O(1)-Al(1)-O(9)                                                                                        | 84.91(9)   | O(2)-P(1)-O(4)     | 111.24(13) |
| O(1)-Al(1)-O(10)#1                                                                                     | 87.48(9)   | O(4)-P(1)-O(3)     | 106.99(19) |
| O(2)#2-Al(1)-O(1)                                                                                      | 174.20(10) | O(5)-P(2)-O(6)     | 108.45(12) |
| O(2)#2-Al(1)-O(9)                                                                                      | 89.72(9)   | O(5)-P(2)-O(7)     | 110.96(12) |
| O(2)#2-Al(1)-O(10)#1                                                                                   | 89.66(9)   | O(7)-P(2)-O(6)     | 107.06(12) |
| O(5)-Al(1)-O(1)                                                                                        | 88.79(10)  | O(8)-P(2)-O(5)     | 111.55(12) |
| O(5)-Al(1)-O(2)#2                                                                                      | 93.25(10)  | O(8)-P(2)-O(6)     | 104.71(12) |
| O(5)-Al(1)-O(8)#3                                                                                      | 96.79(10)  | O(8)-P(2)-O(7)     | 113.69(12) |
| O(5)-Al(1)-O(9)                                                                                        | 88.10(9)   | P(1)-O(1)-Al(1)    | 135.75(14) |
| O(5)-Al(1)-O(10)#1                                                                                     | 170.43(10) | P(1)-O(2)-Al(1)#4  | 142.98(14) |
| O(8)#3-Al(1)-O(1)                                                                                      | 90.18(9)   | P(2)-O(5)-Al(1)    | 141.70(14) |
| O(8)#3-Al(1)-O(2)#2                                                                                    | 94.97(9)   | P(2)-O(8)-Al(1)#3  | 145.34(13) |
| O(8)#3-Al(1)-O(9)                                                                                      | 173.01(9)  | C(1)-O(9)-Al(1)    | 112.61(17) |
| O(8)#3-Al(1)-O(10)#1                                                                                   | 92.04(9)   | C(1)-O(10)-Al(1)#1 | 112.55(17) |
| O(10)#1-Al(1)-O(9)                                                                                     | 82.80(9)   | O(9)-C(1)-O(10)    | 128.1(3)   |
| O(1)-P(1)-O(2)                                                                                         | 112.13(12) | O(9)-C(1)-C(1)#1   | 115.8(3)   |
| O(1)-P(1)-O(3)                                                                                         | 107.88(13) | O(10)-C(1)-C(1)#1  | 116.0(3)   |
| O(1)-P(1)-O(4)                                                                                         | 110.53(15) | C(2)-N(1)-C(3)     | 114.1(3)   |
| O(2)-P(1)-O(3)                                                                                         | 107.83(14) |                    |            |
| Symmetry code: #1 $1-x, -y, -z$ ; #2 $+x, 1/2-y, -1/2+z$ ; #3 $1-x, 1-y, -z$ ; #4 $+x, 1/2-y, 1/2+z$ . |            |                    |            |

Table S3 Selected bond lengths (Å) and bond angles (°) for 2.

| 2                                                                                  |            |                    |            |
|------------------------------------------------------------------------------------|------------|--------------------|------------|
| Ga(1)-O(1)                                                                         | 1.975(2)   | P(2)-O(5)          | 1.519(2)   |
| Ga(1)-O(2)#1                                                                       | 1.940(2)   | P(2)-O(6)          | 1.577(2)   |
| Ga(1)-O(5)                                                                         | 1.894(2)   | P(2)-O(7)          | 1.518(2)   |
| Ga(1)-O(8)#2                                                                       | 1.911(2)   | P(2)-O(8)          | 1.521(2)   |
| Ga(1)-O(9)                                                                         | 2.032(2)   | O(9)-C(1)          | 1.253(4)   |
| Ga(1)-O(10)#3                                                                      | 2.019(2)   | O(10)-C(1)         | 1.253(4)   |
| P(1)-O(1)                                                                          | 1.503(2)   | C(1)-C(1)#3        | 1.527(6)   |
| P(1)-O(2)                                                                          | 1.511(2)   | N(1)-C(2)          | 1.470(5)   |
| P(1)-O(3)                                                                          | 1.574(3)   | N(1)-C(3)          | 1.491(5)   |
| P(1)-O(4)                                                                          | 1.541(3)   |                    |            |
| Symmetry code: #1 +x,1/2-y,-1/2+z; #2 1-x,1-y,-z; #3 1-x,-y,-z.                    |            |                    |            |
| O(1)-Ga(1)-O(9)                                                                    | 83.76(9)   | O(2)-P(1)-O(4)     | 110.84(14) |
| O(1)-Ga(1)-O(10)#1                                                                 | 86.51(9)   | O(4)-P(1)-O(3)     | 107.80(16) |
| O(2)#2-Ga(1)-O(1)                                                                  | 173.67(10) | O(5)-P(2)-O(6)     | 108.45(14) |
| O(2)#2-Ga(1)-O(9)                                                                  | 90.15(9)   | O(5)-P(2)-O(8)     | 112.29(13) |
| O(2)#2-Ga(1)-O(10)#1                                                               | 90.96(9)   | O(7)-P(2)-O(5)     | 110.35(13) |
| O(5)-Ga(1)-O(1)                                                                    | 87.92(9)   | O(7)-P(2)-O(6)     | 107.34(13) |
| O(5)-Ga(1)-O(2)#2                                                                  | 93.64(9)   | O(7)-P(2)-O(8)     | 113.84(14) |
| O(5)-Ga(1)-O(8)#3                                                                  | 95.85(10)  | O(8)-P(2)-O(6)     | 104.12(13) |
| O(5)-Ga(1)-O(9)                                                                    | 88.54(9)   | P(1)-O(1)-Ga(1)    | 133.96(14) |
| O(5)-Ga(1)-O(10)#1                                                                 | 169.38(9)  | P(1)-O(2)-Ga(1)#4  | 140.27(15) |
| O(8)#3-Ga(1)-O(1)                                                                  | 89.16(9)   | P(2)-O(5)-Ga(1)    | 136.00(14) |
| O(8)#3-Ga(1)-O(2)#2                                                                | 96.78(10)  | P(2)-O(8)-Ga(1)#3  | 138.34(14) |
| O(8)#3-Ga(1)-O(9)                                                                  | 171.53(9)  | C(1)-O(9)-Ga(1)    | 112.2(2)   |
| O(8)#3-Ga(1)-O(10)#1                                                               | 93.10(10)  | C(1)-O(10)-Ga(1)#1 | 112.0(2)   |
| O(10)#1-Ga(1)-O(9)                                                                 | 81.88(9)   | O(9)-C(1)-O(10)    | 126.5(3)   |
| O(1)-P(1)-O(2)                                                                     | 111.11(13) | O(9)-C(1)-C(1)#1   | 116.2(3)   |
| O(1)-P(1)-O(3)                                                                     | 108.42(14) | O(10)-C(1)-C(1)#1  | 117.3(4)   |
| O(1)-P(1)-O(4)                                                                     | 110.15(14) | C(2)-N(1)-C(3)     | 114.5(3)   |
| O(2)-P(1)-O(3)                                                                     | 108.42(14) |                    |            |
| Symmetry code: #1 1-x,-y,-z; #2 +x,1/2-y,-1/2+z; #3 1-x,1-y,-z; #4 +x,1/2-y,1/2+z. |            |                    |            |

Table S4 Selected bond lengths (Å) and bond angles (°) for **3**.

| <b>3</b>              |            |                    |           |
|-----------------------|------------|--------------------|-----------|
| In(1)-O(1)            | 2.154(5)   | P(2)-O(8)          | 1.563(8)  |
| In(1)-O(5)            | 2.111(4)   | P(3)-O(9)          | 1.519(5)  |
| In(1)-O(9)            | 2.097(5)   | P(3)-O(10)         | 1.525(5)  |
| In(1)-O(13)#1         | 2.065(5)   | P(3)-O(11)         | 1.575(5)  |
| In(1)-O(18)#2         | 2.213(6)   | P(3)-O(12)         | 1.516(5)  |
| In(1)-O(20)#2         | 2.186(6)   | P(4)-O(13)         | 1.519(6)  |
| In(2)-O(4)#3          | 2.105(5)   | P(4)-O(14)         | 1.569(5)  |
| In(2)-O(6)            | 2.143(5)   | P(4)-O(15)         | 1.526(5)  |
| In(2)-O(10)#2         | 2.114(5)   | P(4)-O(16)         | 1.507(6)  |
| In(2)-O(16)           | 2.087(5)   | O(17)-C(1)         | 1.249(9)  |
| In(2)-O(17)           | 2.186(6)   | O(18)-C(1)         | 1.262(10) |
| In(2)-O(19)           | 2.201(5)   | O(19)-C(2)         | 1.247(9)  |
| P(1)-O(1)             | 1.493(6)   | O(20)-C(2)         | 1.251(9)  |
| P(1)-O(2)             | 1.554(6)   | C(1)-C(2)          | 1.552(9)  |
| P(1)-O(3)             | 1.545(7)   | N(1)-C(3)          | 1.456(17) |
| P(1)-O(4)             | 1.490(5)   | N(1)-C(4)          | 1.455(15) |
| P(2)-O(5)             | 1.496(5)   | N(2)-C(5)          | 1.482(16) |
| P(2)-O(6)             | 1.501(5)   | N(2)-C(6)          | 1.460(15) |
| P(2)-O(7)             | 1.529(7)   |                    |           |
| O(1)-In(1)-O(18)#1    | 87.0(2)    | O(5)-P(2)-O(7)     | 112.1(4)  |
| O(1)-In(1)-O(20)#1    | 90.9(2)    | O(5)-P(2)-O(8)     | 107.8(4)  |
| O(5)-In(1)-O(1)       | 175.72(18) | O(6)-P(2)-O(7)     | 108.9(4)  |
| O(5)-In(1)-O(18)#1    | 90.2(2)    | O(6)-P(2)-O(8)     | 108.9(4)  |
| O(5)-In(1)-O(20)#1    | 91.5(2)    | O(7)-P(2)-O(8)     | 107.2(6)  |
| O(9)-In(1)-O(1)       | 84.5(2)    | O(9)-P(3)-O(10)    | 111.2(3)  |
| O(9)-In(1)-O(5)       | 92.1(2)    | O(9)-P(3)-O(11)    | 108.9(3)  |
| O(9)-In(1)-O(18)#1    | 86.9(2)    | O(10)-P(3)-O(11)   | 104.4(3)  |
| O(9)-In(1)-O(20)#1    | 162.51(19) | O(12)-P(3)-O(9)    | 110.5(3)  |
| O(13)#2-In(1)-O(1)    | 88.1(2)    | O(12)-P(3)-O(10)   | 113.3(3)  |
| O(13)#2-In(1)-O(5)    | 95.3(2)    | O(12)-P(3)-O(11)   | 108.2(3)  |
| O(13)#2-In(1)-O(9)    | 102.2(2)   | O(13)-P(4)-O(14)   | 102.8(3)  |
| O(13)#2-In(1)-O(18)#1 | 169.2(2)   | O(13)-P(4)-O(15)   | 113.1(3)  |
| O(13)#2-In(1)-O(20)#1 | 94.5(2)    | O(15)-P(4)-O(14)   | 108.7(3)  |
| O(20)#1-In(1)-O(18)#1 | 76.0(2)    | O(16)-P(4)-O(13)   | 112.7(3)  |
| O(4)#3-In(2)-O(6)     | 176.4(2)   | O(16)-P(4)-O(14)   | 109.6(4)  |
| O(4)#3-In(2)-O(10)#1  | 96.7(2)    | O(16)-P(4)-O(15)   | 109.7(3)  |
| O(4)#3-In(2)-O(17)    | 91.1(2)    | P(1)-O(1)-In(1)    | 138.7(4)  |
| O(4)#3-In(2)-O(19)    | 93.1(2)    | P(1)-O(4)-In(2)#4  | 147.9(3)  |
| O(6)-In(2)-O(17)      | 87.7(2)    | P(2)-O(5)-In(1)    | 143.7(3)  |
| O(6)-In(2)-O(19)      | 83.3(2)    | P(2)-O(6)-In(2)    | 134.6(3)  |
| O(10)#1-In(2)-O(6)    | 86.9(2)    | P(3)-O(9)-In(1)    | 134.6(3)  |
| O(10)#1-In(2)-O(17)   | 98.3(2)    | P(3)-O(10)-In(2)#2 | 134.1(3)  |
| O(10)#1-In(2)-O(19)   | 168.95(19) | P(4)-O(13)-In(1)#1 | 142.2(3)  |
| O(16)-In(2)-O(4)#3    | 94.9(2)    | P(4)-O(16)-In(2)   | 133.1(3)  |
| O(16)-In(2)-O(6)      | 85.3(2)    | C(1)-O(17)-In(2)   | 113.7(5)  |
| O(16)-In(2)-O(10)#1   | 95.9(2)    | C(1)-O(18)-In(1)#2 | 114.2(4)  |
| O(16)-In(2)-O(17)     | 163.8(2)   | C(2)-O(19)-In(2)   | 114.1(4)  |
| O(16)-In(2)-O(19)     | 88.5(2)    | C(2)-O(20)-In(1)#2 | 114.9(5)  |
| O(17)-In(2)-O(19)     | 76.2(2)    | O(17)-C(1)-O(18)   | 125.0(6)  |
| O(1)-P(1)-O(2)        | 108.1(3)   | O(17)-C(1)-C(2)    | 118.1(6)  |
| O(1)-P(1)-O(3)        | 110.3(4)   | O(18)-C(1)-C(2)    | 116.9(6)  |
| O(3)-P(1)-O(2)        | 104.2(4)   | O(19)-C(2)-O(20)   | 125.1(6)  |
| O(4)-P(1)-O(1)        | 112.5(3)   | O(19)-C(2)-C(1)    | 116.9(6)  |

|                |          |                 |           |
|----------------|----------|-----------------|-----------|
| O(4)-P(1)-O(2) | 111.1(3) | O(20)-C(2)-C(1) | 117.9(6)  |
| O(4)-P(1)-O(3) | 110.4(4) | C(4)-N(1)-C(3)  | 114.4(10) |
| O(5)-P(2)-O(6) | 111.8(3) | C(6)-N(2)-C(5)  | 114.9(10) |

Symmetry code: #1 1-x,1/2+y,1-z; #2 1-x,-1/2+y,1-z; #3 +x,+y,1+z; #4 +x,+y,-1+z.

Table S5 Hydrogen bond parameters of **1**

| D-H...A       | d(D-H) (Å) | d(H...A) (Å) | d(D...A) (Å) | <(DHA) (°) |
|---------------|------------|--------------|--------------|------------|
| O3-H3...O8#1  | 0.819(10)  | 2.20(3)      | 2.860(3)     | 138        |
| O4-H4...O7#2  | 0.77(5)    | 1.73(5)      | 2.496(3)     | 170        |
| O6-H6...O7#3  | 0.815(10)  | 1.765(11)    | 2.577(3)     | 174        |
| N1-H1A...O6#4 | 0.89       | 2.00         | 2.832(4)     | 154        |
| N1-H1B...O1   | 0.89       | 2.04         | 2.871(4)     | 155        |
| N1-H1B...O5   | 0.89       | 2.57         | 3.193(4)     | 128        |
| N1-H1B...O9   | 0.89       | 2.51         | 3.189(4)     | 134        |
| C2-H2A...O9#4 | 0.96       | 2.55         | 3.483(4)     | 165        |
| C2-H2B...O4#5 | 0.96       | 2.61         | 3.487(5)     | 152        |
| C2-H2C...O7   | 0.96       | 2.54         | 3.490(5)     | 172        |
| C3-H3C...O4#5 | 0.96       | 2.49         | 3.365(6)     | 152        |

Symmetry code: #1 1-x,1-y,-z; #2 1-x,-1/2+y,1/2-z; #3 -x,1-y,-z; #4 +x,1/2-y,1/2+z; #5 -1+x,+y,+z.

Table S6 Hydrogen bond parameters of **2**

| D-H...A       | d(D-H) (Å) | d(H...A) (Å) | d(D...A) (Å) | <(DHA) (°) |
|---------------|------------|--------------|--------------|------------|
| O3-H3...O8#1  | 0.814(10)  | 2.12(3)      | 2.823(3)     | 145        |
| O4-H4...O7#2  | 0.90(4)    | 1.62(4)      | 2.511(3)     | 172        |
| O6-H6...O7#3  | 0.73(4)    | 1.83(4)      | 2.557(3)     | 174        |
| N1-H1A...O6#4 | 0.91       | 1.95         | 2.816(4)     | 158        |
| N1-H1B...O1   | 0.91       | 1.98         | 2.843(4)     | 159        |
| N1-H1B...O5   | 0.91       | 2.66         | 3.207(4)     | 120        |
| N1-H1B...O9   | 0.91       | 2.61         | 3.284(4)     | 131        |
| C2-H2A...O9#4 | 0.98       | 2.54         | 3.502(4)     | 166        |
| C3-H3C...O4#5 | 0.98       | 2.48         | 3.389(4)     | 154        |

Symmetry code: #1 1-x,1-y,-z; #2 1-x,-1/2+y,1/2-z; #3 -x,1-y,-z; #4 +x,1/2-y,1/2+z; #5 -1+x,+y,+z.

Table S7 Hydrogen bond parameters of **3**

| D-H...A          | d(D-H) (Å) | d(H...A) (Å) | d(D...A) (Å) | <(DHA) (°) |
|------------------|------------|--------------|--------------|------------|
| O2-H2C...O12#1   | 0.82       | 1.69         | 2.507(7)     | 174        |
| O3-H3D...O21     | 0.82       | 2.00         | 2.801(15)    | 166        |
| O7-H7A...O15#2   | 0.82       | 1.74         | 2.535(8)     | 162        |
| O8-H8A...O10#3   | 0.82       | 1.99         | 2.769(8)     | 158        |
| O11-H11...O15#4  | 0.821(14)  | 1.738(18)    | 2.556(7)     | 174        |
| O14-H14...O12#5  | 0.823(14)  | 1.74(3)      | 2.550(7)     | 169        |
| O21-H21A...O13#7 | 0.826(14)  | 2.34(7)      | 3.032(11)    | 142        |
| O21-H21A...O14#7 | 0.826(14)  | 2.44(17)     | 2.907(11)    | 116        |
| N1-H1A...O6      | 0.89       | 2.06         | 2.900(9)     | 156        |
| N1-H1A...O16     | 0.89       | 2.56         | 3.167(10)    | 126        |
| N1-H1B...O11     | 0.89       | 2.05         | 2.875(10)    | 153        |
| N2-H2A...O21     | 0.89       | 1.96         | 2.816(16)    | 160        |
| N2-H2B...O9      | 0.89       | 2.05         | 2.939(11)    | 173        |
| C4-H4C...O7#6    | 0.96       | 2.63         | 3.564(14)    | 164        |

Symmetry code: #1 1-x,1/2+y,-z; #2 1-x,-1/2+y,1-z; #3 1-x,1/2+y,1-z; #4 2-x,-1/2+y,1-z; #5 2-x,1/2+y,1-z; #6 1+x,+y,+z; #7 +x,+y,-1+z.



Table S8 Summary of counter cations, intra-layered window sizes and the shortest *M-M* distance between the adjacent layers for **1**, **2**, **3**, Hmim·Fe(HPO<sub>4</sub>)(H<sub>2</sub>PO<sub>4</sub>)(C<sub>2</sub>O<sub>4</sub>)<sub>0.5</sub> and CsFe(H<sub>2</sub>PO<sub>4</sub>)(HPO<sub>4</sub>)(C<sub>2</sub>O<sub>4</sub>)<sub>0.5</sub>.

|                                                          | <b>1</b>        | <b>2</b>                                                        | <b>3</b>                            | Hmim·Fe(HPO <sub>4</sub> )(H <sub>2</sub> PO <sub>4</sub> )(C <sub>2</sub> O <sub>4</sub> ) <sub>0.5</sub><br>2 | CsFe(H <sub>2</sub> PO <sub>4</sub> )(HPO <sub>4</sub> )(C <sub>2</sub> O <sub>4</sub> ) <sub>0.5</sub><br>3 |
|----------------------------------------------------------|-----------------|-----------------------------------------------------------------|-------------------------------------|-----------------------------------------------------------------------------------------------------------------|--------------------------------------------------------------------------------------------------------------|
| Counter cations                                          |                 | [(CH <sub>3</sub> ) <sub>2</sub> NH <sub>2</sub> ] <sup>+</sup> |                                     | N-methylimidazolium                                                                                             | Cs <sup>+</sup>                                                                                              |
| The size of intra-layered windows                        | 7.47 Å × 8.29 Å | 7.56 Å × 8.42 Å                                                 | 7.95 Å × 8.84 Å;<br>7.87 Å × 8.78 Å | 7.64 Å × 8.59 Å                                                                                                 | 8.02 Å × 8.41 Å;<br>8.02 Å × 8.73 Å                                                                          |
| the shortest <i>M-M</i> distance between adjacent layers | 8.5858 Å        | 8.6163 Å                                                        | 8.9536 Å                            | 9.1586 Å                                                                                                        | 7.5767 Å                                                                                                     |

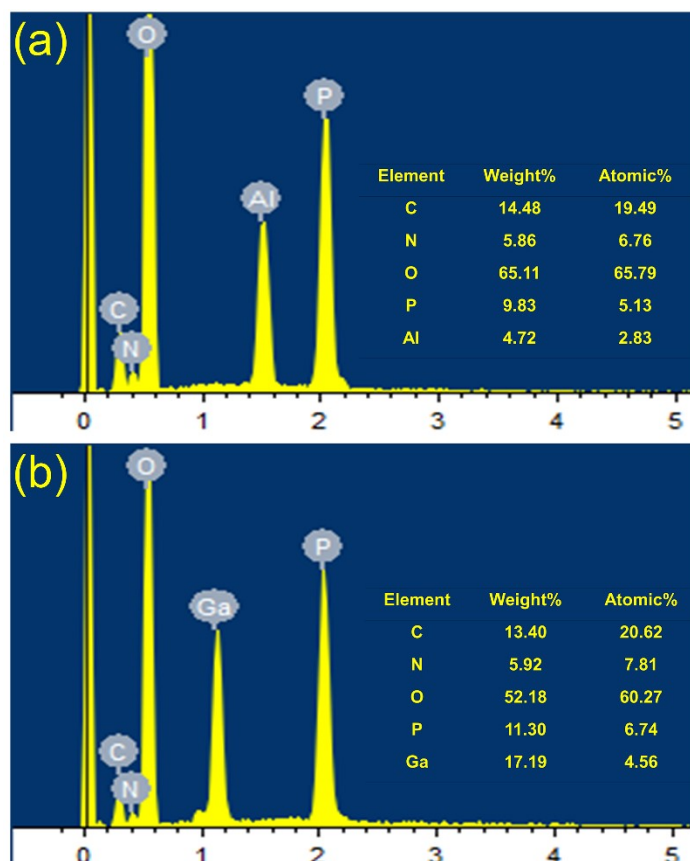

Fig. S1 EDS analysis results of (a) **1** and (b) **2**.

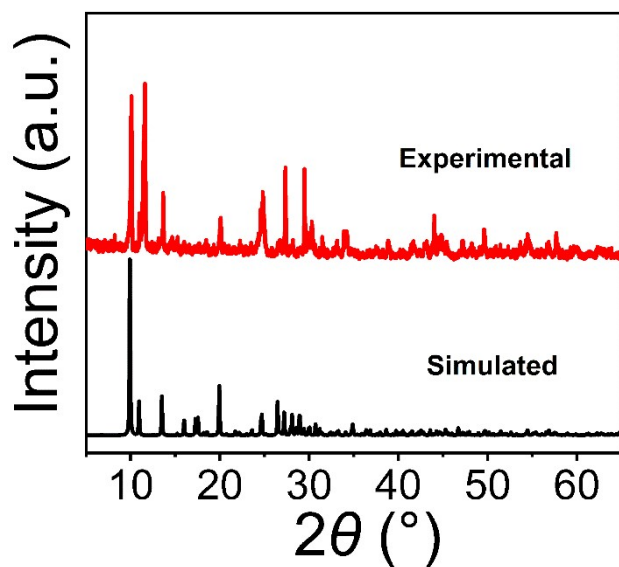

Fig. S2 Comparison of the simulated and experimental PXRD patterns of **3**.

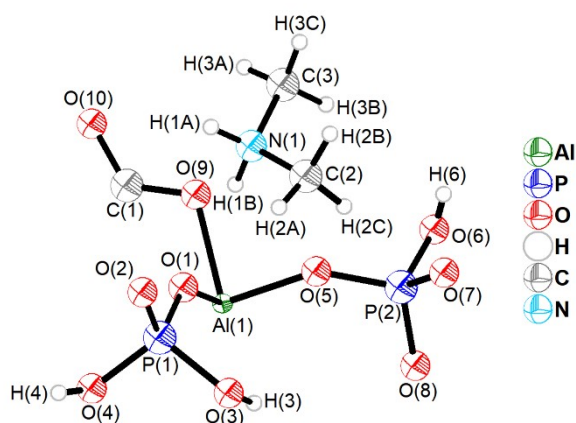

Fig. S3 ORTEP plot (50% ellipsoid probability) showing the crystallographically asymmetric unit of **1**.

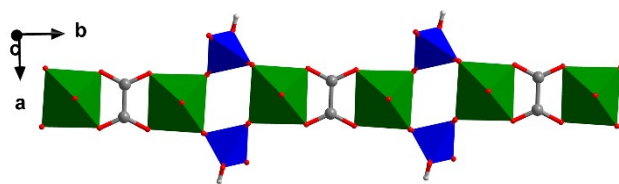

Fig. S4 An infinite chain constructed with the dinuclear  $\text{Al}_2\text{O}_8(\text{C}_2\text{O}_4)$  units connected by two  $\text{HPO}_4$  units in **1**. The green and blue polyhedra represent  $\text{AlO}_6$  octahedra and  $\text{PO}_4$  tetrahedra, respectively; atom colors: H = white, C = grey.

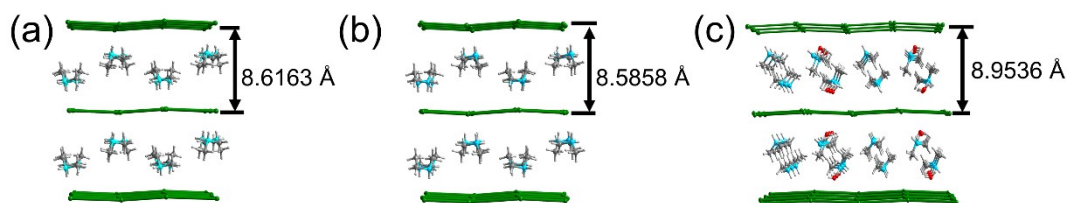

Fig. S5 The shortest  $M-M$  distance between the adjacent layers of **1** (a), **2** (b) and **3** (c).

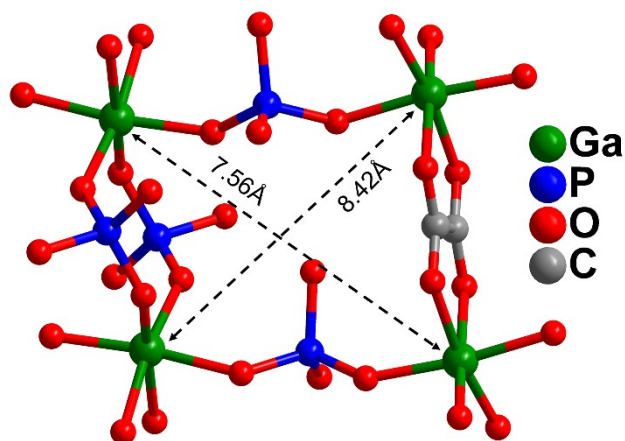

Fig. S6 The ball-and-stick representation of 8-ring window in the anionic layer of **2**.

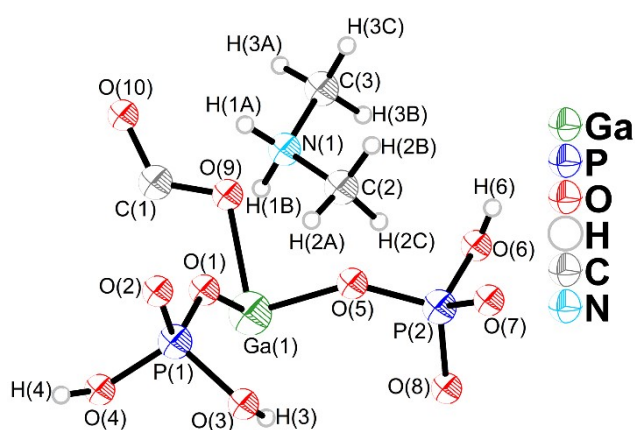

Fig. S7 *ORTEP* plot (50% ellipsoid probability) showing the crystallographically asymmetric unit of **2**.

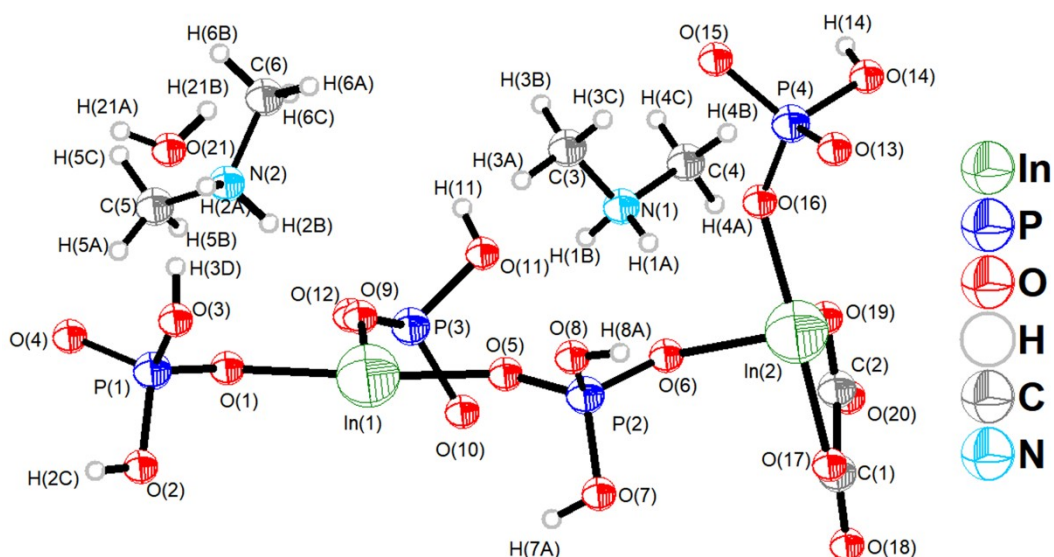

Fig. S8 *ORTEP* plot (50% ellipsoid probability) showing the crystallographically asymmetric unit of **3**.

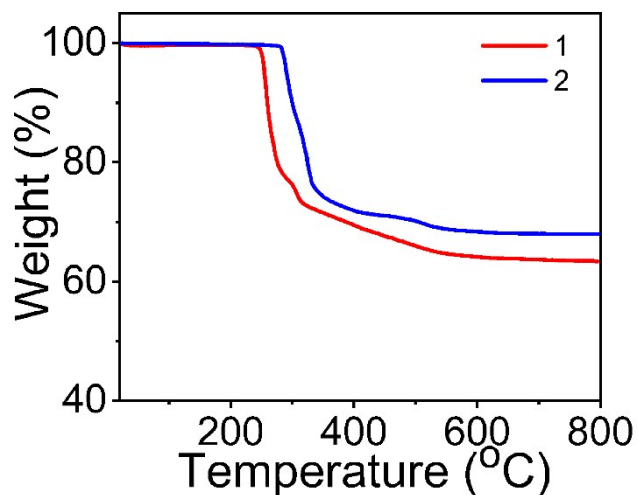

Fig. S9 Thermogravimetric curves for **1** and **2**.

Table S9 Proton conductivity ( $\sigma$ ) values of **1** and **2** at 25 °C under varied RH conditions.

| <b>1</b>                       |                       |                       |                       |
|--------------------------------|-----------------------|-----------------------|-----------------------|
| RH %                           | 70                    | 85                    | 98                    |
| $\sigma$ (S cm <sup>-1</sup> ) | $8.35 \times 10^{-7}$ | $4.75 \times 10^{-6}$ | $8.92 \times 10^{-5}$ |
| <b>2</b>                       |                       |                       |                       |
| RH %                           | 70                    | 80                    | 85                    |
| $\sigma$ (S cm <sup>-1</sup> ) | $4.37 \times 10^{-7}$ | $2.40 \times 10^{-6}$ | $5.77 \times 10^{-5}$ |

Table S10 Proton conductivity ( $\sigma$ ) values of **1** and **2** under 98% RH and at different temperatures.

| <b>1</b>                       |                       |                       |                       |                       |                       |
|--------------------------------|-----------------------|-----------------------|-----------------------|-----------------------|-----------------------|
| $T/^\circ\text{C}$             | 45                    | 55                    | 65                    | 75                    | 85                    |
| $\sigma$ (S cm <sup>-1</sup> ) | $1.02 \times 10^{-3}$ | $1.79 \times 10^{-3}$ | $2.87 \times 10^{-3}$ | $5.75 \times 10^{-3}$ | $9.09 \times 10^{-3}$ |
| <b>2</b>                       |                       |                       |                       |                       |                       |
| $T/^\circ\text{C}$             | 45                    | 55                    | 65                    | 75                    | 85                    |
| $\sigma$ (S cm <sup>-1</sup> ) | $3.71 \times 10^{-4}$ | $4.54 \times 10^{-4}$ | $5.18 \times 10^{-4}$ | $1.3 \times 10^{-3}$  | $6.43 \times 10^{-3}$ |

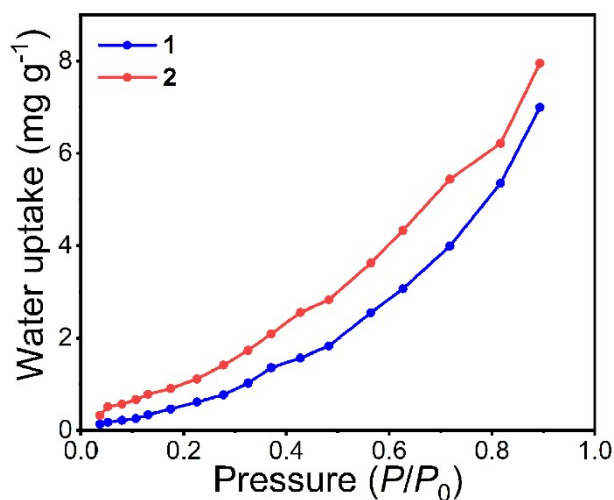

Fig. S10 Water vapor adsorption isotherms of compounds **1** and **2** at 25 °C.

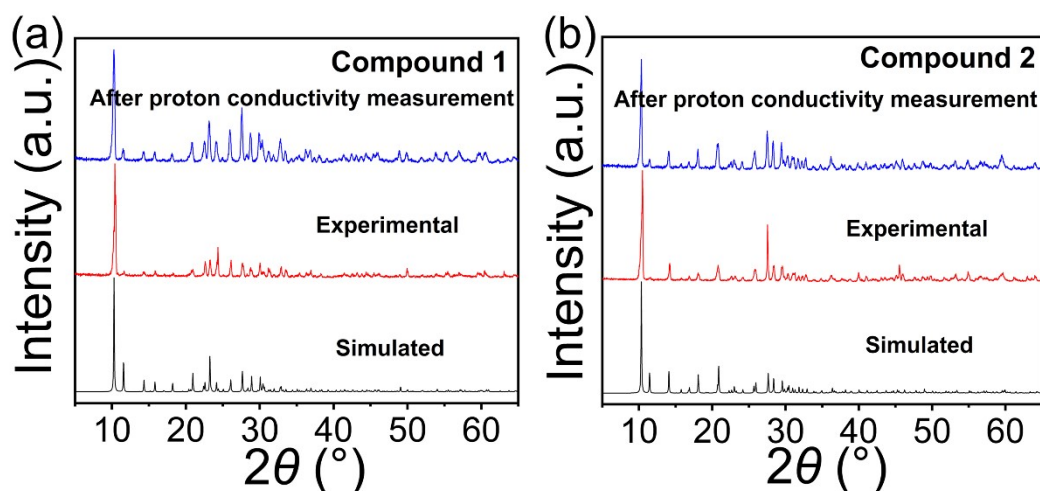

Fig. S11 PXRD patterns of **1** (a), **2** (b) and both samples after proton conductivity measurement. All are in good agreement with the corresponding simulated PXRD pattern calculated from single crystal X-ray data. All lines are refined compared with that in Fig. 3.

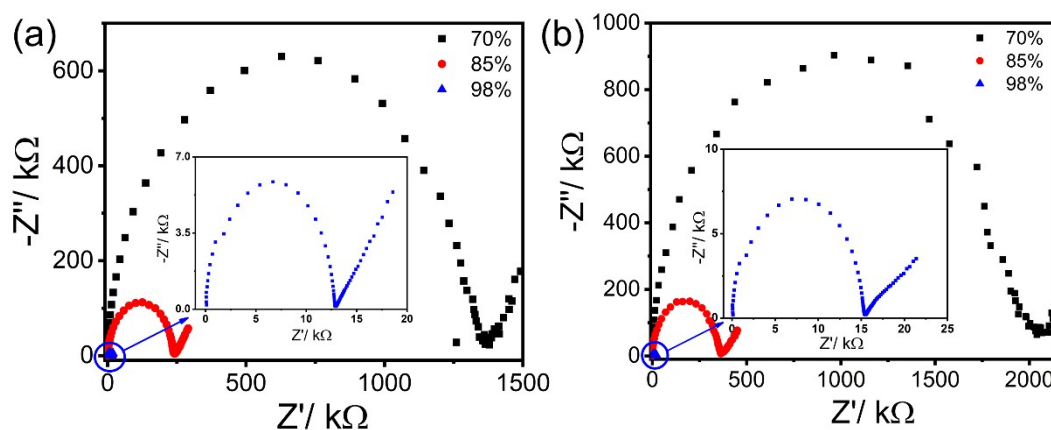

Fig. S12 The Nyquist plots of **1** (a) and **2** (b) under 70-98% RH at 25°C.

## References

- Sheldrick, G. M., Crystal structure refinement with SHELXL, *Acta Crystallogr. C Struct. Chem.* 2015, **71**, 3-8.
- J. Zhang, Q. Lei, L. Luan, H. Zeng, G. Zou and Z. Lin, N-methylimidazolium containing metal phosphate–oxalates: solvent-free synthesis, crystal structure, and proton conduction, *CrystEngComm*, 2022, **24**, 743-746.
- C. Y. Sheu, S. F. Lee and K. H. Lii, Ionic liquid of choline chloride/malonic acid as a solvent in the synthesis of open-framework iron oxalato phosphates, *Inorg. Chem.*, 2006, **45**, 1891-1893.
